# Supplementary material for: Considering the Value of 3D Cultures for Enhancing the Understanding of Adhesion, Proliferation, and Osteogenesis on Titanium Dental Implants
Source: MDPI journal article supplement (doi:10.3390/biom13071048), 2023-06-28
Supplement: s1 [file s1]

## Supplemental Tables

**Supplemental Table S1: Summary of the adhesion results on the different Titanium Implants surface.** The table shows the amount of counted cells and the relative statistical significance at the tested timepoints. The data is significant with  $p \leq 0.001$  (ANOVA followed by Bonferroni's post hoc test or paired t-test). \*24h-3days, ^24h-7days and %3-7days (paired t-test) indicating significance.

| Reference Implant | Timepoints | Between Timepoints | Cell Number   | Implant Type      | 24 hours | 3 days | 7 days |
|-------------------|------------|--------------------|---------------|-------------------|----------|--------|--------|
| <b>Al Blast</b>   |            |                    |               | <b>Ti Blast</b>   | 1        | 1      | 1      |
|                   | 24 hours   | T1-T2(*) 0.784     | 65.3 ± 30     | <b>Laser Mach</b> | <0.001   | 0.126  | <0.001 |
|                   | 3 days     | T1-T3(^) <0.001    | 67.3 ± 37.6   | <b>Laser Sint</b> | <0.001   | 0.002  | <0.001 |
|                   | 7 days     | T2-T3(%) <0.001    | 35.7 ± 16.2   | <b>Cor Blast</b>  | 1        | <0.001 | <0.001 |
| <b>Cor Blast</b>  |            |                    |               | <b>Ti Blast</b>   | 1        | 0.001  | 0.024  |
|                   | 24 hours   | T1-T2(*) <0.001    | 59.2 ± 48     | <b>Al Blast</b>   | 1        | <0.001 | <0.001 |
|                   | 3 days     | T1-T3(^) 0.006     | 145 ± 71.7    | <b>Laser Mach</b> | <0.001   | 0.295  | 1      |
|                   | 7 days     | T2-T3(%) 0.080     | 114 ± 64.2    | <b>Laser Sint</b> | <0.001   | 1      | <0.001 |
| <b>Ti Blast</b>   |            |                    |               | <b>Al Blast</b>   | 1        | 1      | 1      |
|                   | 24 hours   | T1-T2(*) 0.550     | 87.1 ± 20.1   | <b>Laser Mach</b> | <0.001   | 0.889  | <0.001 |
|                   | 3 days     | T1-T3(^) 0.011     | 79.2 ± 56.2   | <b>Laser Sint</b> | 0.001    | 0.032  | <0.001 |
|                   | 7 days     | T2-T3(%) 0.278     | 62.7 ± 40.6   | <b>Cor Blast</b>  | 1        | 0.001  | 0.024  |
| <b>Laser Sint</b> |            |                    |               | <b>Ti Blast</b>   | 0.001    | 0.032  | <0.001 |
|                   | 24 hours   | T1-T2(*) 0.084     | 152.8 ± 36.4  | <b>Al Blast</b>   | <0.001   | 0.002  | <0.001 |
|                   | 3 days     | T1-T3(^) 0.008     | 127.4 ± 62.14 | <b>Laser Mach</b> | 1        | 1      | 0.003  |
|                   | 7 days     | T2-T3(%) 0.008     | 199.6 ± 63.2  | <b>Cor Blast</b>  | <0.001   | 1      | <0.001 |
| <b>Laser Mach</b> |            |                    |               | <b>Ti Blast</b>   | <0.001   | 0.889  | <0.001 |
|                   | 24 hours   | T1-T2(*) <0.001    | 159 ± 32.8    | <b>Al Blast</b>   | <0.001   | 0.126  | <0.001 |
|                   | 3 days     | T1-T3(^) 0.162     | 108.5 ± 39.9  | <b>Laser Sint</b> | 1        | 1      | 0.003  |
|                   | 7 days     | T2-T3(%) 0.143     | 138.2 ± 83    | <b>Cor Blast</b>  | <0.001   | 0.295  | 1      |

**Supplemental Table S2: Summary of the viability results on the different Titanium Implants surface.** The table shows viability across the time-points respect the different implant types the relative statistical significance at the tested timepoints. The data is significant with  $p \leq 0.001$  (ANOVA followed by Bonferroni's post hoc test or paired t-test). \*24h-3days, ^24h-7days and %3-7days (paired t-test) indicating significance.

| Reference Implant | Timepoints | Between Timepoints | Viability    | Implant Type      | 24 hours | 3 days | 7 days |
|-------------------|------------|--------------------|--------------|-------------------|----------|--------|--------|
| <b>Al Blast</b>   |            |                    |              | <b>Ti Blast</b>   | 1        | 1      | 0.139  |
|                   | 24 hours   | T1(*) 0.016        | 0.03 ± 0.56  | <b>Laser Mach</b> | 1        | 0.008  | 0.007  |
|                   | 3 days     | T2(^) 0.026        | -0.5 ± 0.53  | <b>Laser Sint</b> | 1        | <0.001 | <0.001 |
|                   | 7 days     | T3(%) <0.001       | -0.88 ± 0.83 | <b>Cor Blast</b>  | <0.001   | 1      | <0.001 |
| <b>Cor Blast</b>  |            |                    |              | <b>Ti Blast</b>   | <0.001   | 1      | <0.001 |
|                   | 24 hours   | T1(*) <0.001       | 1.7 ± 1.66   | <b>Al Blast</b>   | <0.001   | 1      | <0.001 |
|                   | 3 days     | T2(^) <0.001       | -0.25 ± 0.67 | <b>Laser Mach</b> | <0.001   | 0.191  | 0.006  |
|                   | 7 days     | T3(%) 0.001        | 0.57 ± 0.92  | <b>Laser Sint</b> | <0.001   | <0.001 | 1      |
| <b>Ti Blast</b>   |            |                    |              | <b>Al Blast</b>   | 1        | 1      | 0.139  |

|                   |          |              |               |                   |        |        |        |
|-------------------|----------|--------------|---------------|-------------------|--------|--------|--------|
| <b>Laser Sint</b> | 24 hours | T1(*) 0.718  | -0.085 ± 0.69 | <b>Laser Mach</b> | 1      | 0.353  | 1      |
|                   | 3 days   | T2(^) 0.298  | -0.19 ± 0.87  | <b>Laser Sint</b> | 1      | <0.001 | 0.011  |
|                   | 7 days   | T3(%) 0.136  | -0.36 ± 0.64  | <b>Cor Blast</b>  | <0.001 | 1      | <0.001 |
|                   |          |              |               | <b>Ti Blast</b>   | 1      | <0.001 | 0.011  |
| <b>Laser Mach</b> | 24 hours | T1(*) 0.001  | -0.23 ± 0.62  | <b>Al Blast</b>   | 1      | <0.001 | <0.001 |
|                   | 3 days   | T2(^) 0.003  | 0.78 ± 0.88   | <b>Laser Mach</b> | 1      | 0.354  | 0.204  |
|                   | 7 days   | T3(%) <0.001 | 0.32 ± 0.54   | <b>Cor Blast</b>  | <0.001 | <0.001 | 1      |
|                   |          |              |               | <b>Ti Blast</b>   | 1      | 0.353  | 1      |
|                   |          |              |               | <b>Al Blast</b>   | 0.403  | 0.464  | 0.007  |
|                   | 3 days   | T2(^) 0.001  | 0.29 ± 0.94   | <b>Laser Sint</b> | 1      | 0.354  | 0.204  |
|                   | 7 days   | T3(%) 0.288  | -0.16 ± 0.55  | <b>Cor Blast</b>  | <0.001 | 0.191  | 0.006  |

**Supplemental Table S3. Summary table of the ADSCs' m-RNA expression on different implants at various time points.** Summary and comparison of the data analysis of the m-RNA (*alp*, *osn*, and *coll-I*) synthesized by the ADSCs on the different implants at different time points. The data is significant at  $p \leq 0.05$  (paired t-test). Abbreviations: alkaline phosphatase(*alp*); osteonectin(*osn*); collagen type I (*coll-I*).

| <b>Reference Implant</b> | <b>Implant Type</b> | <b>coll-I</b>   |               |               | <b>alp</b>      |               |               | <b>osn</b>      |               |               |
|--------------------------|---------------------|-----------------|---------------|---------------|-----------------|---------------|---------------|-----------------|---------------|---------------|
|                          |                     | <b>24 hours</b> | <b>3 days</b> | <b>7 days</b> | <b>24 hours</b> | <b>3 days</b> | <b>7 days</b> | <b>24 hours</b> | <b>3 days</b> | <b>7 days</b> |
| <b>Ti Blast</b>          | Al Blast            | <0.001          | 0.038         | <0.001        | <0.001          | <0.001        | <0.001        | N/C             | <0.001        | <0.001        |
|                          | Laser Mach          | <0.001          | <0.001        | <0.001        | <0.001          | <0.001        | <0.001        | <0.001          | <0.001        | <0.001        |
|                          | Laser Sint          | <0.001          | <0.001        | <0.001        | <0.001          | <0.001        | <0.001        | <0.001          | <0.001        | <0.001        |
|                          | Cor Blast           | 0.037           | <0.001        | <0.001        | 0.191           | <0.001        | <0.001        | <0.001          | <0.001        | <0.001        |
| <b>Al Blast</b>          | Ti Blast            | <0.001          | 0.038         | <0.001        | <0.001          | <0.001        | <0.001        | N/C             | <0.001        | <0.001        |
|                          | Laser Mach          | <0.001          | <0.001        | <0.001        | <0.001          | <0.001        | <0.001        | <0.001          | <0.001        | <0.001        |
|                          | Laser Sint          | <0.001          | <0.001        | <0.001        | <0.001          | <0.001        | <0.001        | <0.001          | 0.009         | <0.001        |
|                          | Cor Blast           | <0.001          | <0.001        | <0.001        | <0.001          | <0.001        | <0.001        | <0.001          | 0.107         | <0.001        |
| <b>Laser Mach</b>        | Ti Blast            | <0.001          | <0.001        | <0.001        | <0.001          | <0.001        | <0.001        | <0.001          | <0.001        | <0.001        |
|                          | Al Blast            | <0.001          | <0.001        | <0.001        | <0.001          | <0.001        | <0.001        | <0.001          | <0.001        | <0.001        |
|                          | Laser Sint          | 1               | 0.473         | 1             | 0.005           | <0.001        | 0.406         | <0.001          | 0.002         | 0.001         |
|                          | Cor Blast           | <0.001          | 0.001         | <0.001        | <0.001          | <0.001        | <0.001        | 0.001           | <0.001        | <0.001        |
| <b>Laser Sint</b>        | Ti Blast            | <0.001          | <0.001        | <0.001        | <0.001          | <0.001        | <0.001        | <0.001          | <0.001        | <0.001        |
|                          | Al Blast            | <0.001          | <0.001        | <0.001        | <0.001          | <0.001        | <0.001        | <0.001          | 0.009         | <0.001        |
|                          | Laser Mach          | 1               | 0.473         | 1             | 0.005           | <0.001        | 0.406         | <0.001          | 0.002         | 0.001         |
|                          | Cor Blast           | <0.001          | 0.07          | <0.001        | <0.001          | 0.51          | <0.001        | <0.001          | 1             | <0.001        |
| <b>Cor Blast</b>         | Ti Blast            | 0.037           | <0.001        | <0.001        | 0.191           | <0.001        | <0.001        | <0.001          | <0.001        | <0.001        |
|                          | Al Blast            | <0.001          | <0.001        | <0.001        | <0.001          | <0.001        | <0.001        | <0.001          | 0.107         | <0.001        |
|                          | Laser Mach          | <0.001          | 0.001         | <0.001        | <0.001          | <0.001        | <0.001        | 0.001           | <0.001        | <0.001        |
|                          | Laser Sint          | <0.001          | 0.07          | <0.001        | <0.001          | 0.51          | <0.001        | <0.001          | 1             | <0.001        |

**Supplemental Table S4.** Comparison of m-RNA expression on different implants at various time points. An overview of the data analysis comparison of the m-RNA (*alp*, *osn*, and *coll-I*) expressed by ADSCs on various implants at different time points. The data is significant with \*24h-3days, ^24h-7days and %3-7days (paired t-test) indicating significance. Abbreviations: alkaline phosphatase (*alp*); osteonectin (*osn*); collagen type I (*coll-I*).

| <i>Implant</i>           | <i>Time points</i> | <i>coll-I</i> | <i>alp</i> | <i>osn</i> |
|--------------------------|--------------------|---------------|------------|------------|
| <b><i>Ti Blast</i></b>   | T1/T2 (*)          | 0.78          | 0.909      | 0.002      |
|                          | T1/T3 (^)          | 0.007         | 0.001      | <0.001     |
|                          | T2/T3 (%)          | 0.001         | 0.001      | 0.001      |
| <b><i>Al Blast</i></b>   | T1/T2 (*)          | 0.017         | N/D        | 0.01       |
|                          | T1/T3 (^)          | 0.001         | 0.001      | <0.001     |
|                          | T2/T3 (%)          | 0.003         | 0.001      | <0.001     |
| <b><i>Laser Mach</i></b> | T1/T2 (*)          | 0.002         | 0.013      | 0.027      |
|                          | T1/T3 (^)          | 0.004         | 0.004      | 0.018      |
|                          | T2/T3 (%)          | 0.017         | 0.003      | 0.022      |
| <b><i>Laser Sint</i></b> | T1/T2 (*)          | 0.006         | 0.686      | 0.001      |
|                          | T1/T3 (^)          | 0.212         | 0.263      | <0.001     |
|                          | T2/T3 (%)          | 0.851         | 0.036      | <0.001     |
| <b><i>Cor Blast</i></b>  | T1/T2 (*)          | 0.001         | 0.008      | 0.007      |
|                          | T1/T3 (^)          | 0.425         | 0.443      | 0.001      |
|                          | T2/T3 (%)          | 0.007         | 0.002      | 0.001      |
